# Supplementary material
Source: PubMed Central journal article supplement (PMC3193582)
Supplement: NIHMS324950-supplement-1_si_001.pdf [file NIHMS324950-supplement-1_si_001.pdf]

## Supplementary Materials

### Ratio Analysis NMR Spectroscopy (RANSY) for Selective Metabolite Identification in Complex Samples

Siwei Wei<sup>1</sup>, Jian Zhang<sup>1</sup>, Lingyan Liu<sup>2</sup>, Tao Ye<sup>1</sup>, G. A. Nagana Gowda<sup>1</sup>,

Fariba Tayyari<sup>1</sup>, and Daniel Raftery<sup>1\*</sup>

<sup>1</sup>*Department of Chemistry, Purdue University, 560 Oval Drive, West Lafayette, Indiana 47907, and* <sup>2</sup>*Weldon School of Biomedical Engineering, Purdue University, 206 S. Martin Jischke Drive, West Lafayette, IN 47907*

\*Corresponding author:

Tel: [\(765\)494-6070](tel:(765)494-6070)

Fax: (765)494-0239

Email: [raftery@purdue.edu](mailto:raftery@purdue.edu)

Supplementary figures and tables:

|                     |                                                                                             |
|---------------------|---------------------------------------------------------------------------------------------|
| Table S-1           | Concentrations of 33 metabolites in 15 samples.                                             |
| Table S-2           | Concentrations of 15 metabolites in 10 samples with a larger concentration range.           |
| Figure S-1          | Selective detection of betaine, $\beta$ -alanine and hippuric acid by the RANSY method.     |
| Table S-3           | Peak assignment for 33 derivatized metabolites in 2D $^1\text{H}$ - $^{15}\text{N}$ spectra |
| Figure S-2          | RANSY spectra of valine generated from different number of samples.                         |
| Supplementary Codes | R codes for RANSY                                                                           |

| Name                 | S1   | S2   | S3   | S4   | S5   | S6   | S7   | S8   | S9   | S10  | S11  | S12  | S13  | S14  | S15  |
|----------------------|------|------|------|------|------|------|------|------|------|------|------|------|------|------|------|
| acetic acid          | 0.08 | 0.1  | 0.06 | 0.08 | 0.08 | 0.08 | 0.08 | 0.08 | 0.1  | 0.06 | 0.08 | 0.06 | 0.1  | 0.1  | 0.1  |
| cis-aconitic acid    | 0.08 | 0.1  | 0.08 | 0.1  | 0.1  | 0.06 | 0.08 | 0.08 | 0.08 | 0.1  | 0.08 | 0.08 | 0.1  | 0.06 | 0.08 |
| $\beta$ -alanine     | 0.08 | 0.1  | 0.08 | 0.1  | 0.1  | 0.1  | 0.1  | 0.08 | 0.08 | 0.08 | 0.08 | 0.06 | 0.1  | 0.1  | 0.06 |
| betaine              | 0.1  | 0.08 | 0.08 | 0.06 | 0.08 | 0.08 | 0.14 | 0.14 | 0.06 | 0.1  | 0.14 | 0.1  | 0.1  | 0.1  | 0.06 |
| citric acid          | 0.36 | 0.16 | 0.26 | 0.24 | 0.26 | 0.16 | 0.26 | 0.22 | 0.3  | 0.48 | 0.26 | 0.48 | 0.5  | 0.22 | 0.46 |
| L-cysteine           | 0.1  | 0.14 | 0.14 | 0.12 | 0.08 | 0.14 | 0.08 | 0.1  | 0.12 | 0.12 | 0.12 | 0.12 | 0.12 | 0.1  | 0.14 |
| formic acid          | 0.24 | 0.4  | 0.3  | 0.5  | 0.32 | 0.32 | 0.32 | 0.14 | 0.4  | 0.2  | 0.4  | 0.24 | 0.12 | 0.28 | 0.28 |
| fumaric acid         | 0.1  | 0.08 | 0.1  | 0.08 | 0.06 | 0.08 | 0.1  | 0.08 | 0.1  | 0.1  | 0.08 | 0.1  | 0.08 | 0.06 | 0.1  |
| glucuronic acid      | 0.4  | 0.32 | 0.24 | 0.22 | 0.16 | 0.12 | 0.48 | 0.46 | 0.38 | 0.34 | 0.32 | 0.14 | 0.38 | 0.26 | 0.34 |
| L-glutamic acid      | 0.1  | 0.08 | 0.1  | 0.08 | 0.08 | 0.06 | 0.08 | 0.1  | 0.1  | 0.1  | 0.1  | 0.06 | 0.08 | 0.1  | 0.08 |
| Glycine              | 0.46 | 0.38 | 0.12 | 0.16 | 0.4  | 0.12 | 0.34 | 0.44 | 0.48 | 0.5  | 0.28 | 0.5  | 0.42 | 0.12 | 0.4  |
| guanidineacetic acid | 0.1  | 0.08 | 0.08 | 0.08 | 0.1  | 0.1  | 0.1  | 0.08 | 0.1  | 0.08 | 0.08 | 0.06 | 0.1  | 0.1  | 0.08 |
| hippuric acid        | 0.08 | 0.06 | 0.06 | 0.1  | 0.06 | 0.08 | 0.1  | 0.1  | 0.08 | 0.06 | 0.08 | 0.1  | 0.06 | 0.08 | 0.08 |
| L-histidine          | 0.14 | 0.14 | 0.14 | 0.08 | 0.06 | 0.12 | 0.08 | 0.1  | 0.1  | 0.14 | 0.14 | 0.1  | 0.12 | 0.12 | 0.1  |
| 4-hydroxy-L-proline  | 0.08 | 0.08 | 0.08 | 0.1  | 0.08 | 0.1  | 0.1  | 0.06 | 0.1  | 0.08 | 0.08 | 0.1  | 0.06 | 0.08 | 0.1  |
| isocitric acid       | 0.08 | 0.03 | 0.08 | 0.1  | 0.06 | 0.1  | 0.08 | 0.1  | 0.08 | 0.08 | 0.08 | 0.1  | 0.08 | 0.06 | 0.08 |
| L-lactic acid        | 1.7  | 1.34 | 1.96 | 1.44 | 1.76 | 1.7  | 1.7  | 1.88 | 1.92 | 1.46 | 1.5  | 1.38 | 1.58 | 1.4  | 1.88 |
| L-leucine            | 0.12 | 0.1  | 0.22 | 0.2  | 0.18 | 0.18 | 0.2  | 0.22 | 0.22 | 0.28 | 0.16 | 0.18 | 0.1  | 0.22 | 0.08 |
| maleic acid          | 0.1  | 0.08 | 0.08 | 0.08 | 0.08 | 0.1  | 0.06 | 0.06 | 0.08 | 0.08 | 0.1  | 0.08 | 0.1  | 0.1  | 0.06 |
| malic acid           | 0.08 | 0.1  | 0.1  | 0.08 | 0.06 | 0.08 | 0.1  | 0.1  | 0.08 | 0.1  | 0.1  | 0.08 | 0.06 | 0.08 | 0.06 |
| malonic acid         | 0.08 | 0.08 | 0.08 | 0.1  | 0.08 | 0.1  | 0.1  | 0.06 | 0.1  | 0.08 | 0.08 | 0.1  | 0.06 | 0.08 | 0.1  |
| L-mandelic acid      | 0.12 | 0.14 | 0.12 | 0.12 | 0.16 | 0.1  | 0.12 | 0.14 | 0.14 | 0.12 | 0.12 | 0.14 | 0.12 | 0.12 | 0.08 |
| L-methionine         | 0.08 | 0.08 | 0.1  | 0.1  | 0.08 | 0.06 | 0.1  | 0.1  | 0.1  | 0.08 | 0.08 | 0.1  | 0.08 | 0.06 | 0.08 |
| methylmalonic acid   | 0.1  | 0.08 | 0.1  | 0.1  | 0.1  | 0.1  | 0.08 | 0.06 | 0.1  | 0.1  | 0.08 | 0.08 | 0.08 | 0.1  | 0.1  |
| octanoic acid        | 0.08 | 0.1  | 0.1  | 0.06 | 0.08 | 0.08 | 0.1  | 0.1  | 0.08 | 0.1  | 0.06 | 0.08 | 0.1  | 0.1  | 0.08 |
| oxalic acid          | 0.1  | 0.08 | 0.08 | 0.1  | 0.06 | 0.1  | 0.1  | 0.1  | 0.1  | 0.06 | 0.06 | 0.08 | 0.1  | 0.08 | 0.06 |
| L-phenylalanine      | 0.14 | 0.06 | 0.12 | 0.12 | 0.14 | 0.1  | 0.08 | 0.12 | 0.08 | 0.12 | 0.1  | 0.06 | 0.1  | 0.12 | 0.12 |
| propionic acid       | 0.06 | 0.1  | 0.1  | 0.1  | 0.08 | 0.08 | 0.1  | 0.08 | 0.08 | 0.08 | 0.08 | 0.06 | 0.08 | 0.08 | 0.08 |
| suberic acid         | 0.1  | 0.1  | 0.1  | 0.1  | 0.06 | 0.1  | 0.1  | 0.1  | 0.1  | 0.08 | 0.06 | 0.08 | 0.08 | 0.06 | 0.08 |
| succinic acid        | 0.08 | 0.08 | 0.06 | 0.08 | 0.08 | 0.08 | 0.1  | 0.06 | 0.08 | 0.1  | 0.06 | 0.1  | 0.1  | 0.08 | 0.1  |
| L-threonine          | 0.24 | 0.2  | 0.24 | 0.3  | 0.14 | 0.22 | 0.14 | 0.26 | 0.28 | 0.1  | 0.1  | 0.28 | 0.22 | 0.16 | 0.1  |
| L-tryptophan         | 0.1  | 0.08 | 0.08 | 0.1  | 0.08 | 0.08 | 0.1  | 0.1  | 0.08 | 0.08 | 0.08 | 0.06 | 0.08 | 0.1  | 0.06 |
| L-tyrosine           | 0.08 | 0.06 | 0.1  | 0.1  | 0.08 | 0.06 | 0.06 | 0.1  | 0.1  | 0.1  | 0.1  | 0.08 | 0.1  | 0.08 | 0.08 |

**Table S-1:** Experimental design for the 33 standard mixtures (S1-S15). Units for all metabolite concentrations are mM.

| Name              | S1   | S2   | S3   | S4   | S5   | S6   | S7   | S8   | S9   | S10  |
|-------------------|------|------|------|------|------|------|------|------|------|------|
| acetic acid       | 2    | 0.1  | 0.06 | 0.4  | 0.08 | 0.08 | 0.08 | 0.8  | 0.03 | 0.06 |
| cis-aconitic acid | 0.08 | 1.6  | 0.03 | 0.1  | 2    | 0.06 | 0.08 | 0.08 | 1    | 0.1  |
| $\beta$ -alanine  | 0.06 | 0.03 | 2    | 0.06 | 0.08 | 1.2  | 0.08 | 0.08 | 0.08 | 0.4  |
| betaine           | 0.4  | 0.1  | 0.8  | 0.1  | 0.03 | 0.1  | 0.1  | 2    | 0.08 | 1.6  |
| citric acid       | 0.03 | 0.1  | 0.1  | 0.1  | 0.8  | 0.1  | 0.1  | 0.4  | 2    | 0.08 |
| glycine           | 0.14 | 0.06 | 0.08 | 0.1  | 0.06 | 1.2  | 0.4  | 0.03 | 0.12 | 2    |
| glycolic acid     | 0.03 | 2    | 1.2  | 0.4  | 0.06 | 0.1  | 0.08 | 0.08 | 0.08 | 0.08 |
| hippuric acid     | 0.03 | 0.08 | 0.4  | 1.2  | 2    | 0.08 | 0.14 | 0.14 | 0.06 | 0.1  |
| L-histidine       | 0.4  | 2    | 0.8  | 0.24 | 0.03 | 0.16 | 0.26 | 0.22 | 0.3  | 0.48 |
| isocitric acid    | 2    | 0.03 | 0.14 | 0.12 | 0.8  | 0.14 | 0.08 | 0.1  | 0.4  | 0.12 |
| L-leucine         | 0.2  | 0.4  | 0.1  | 0.2  | 0.03 | 2    | 1.6  | 0.16 | 0.36 | 0.2  |
| maleic acid       | 0.4  | 0.4  | 0.03 | 2    | 0.06 | 0.08 | 0.1  | 0.08 | 0.1  | 0.1  |
| L-phenylalanine   | 0.4  | 2    | 0.24 | 0.22 | 0.16 | 0.12 | 0.03 | 0.4  | 0.1  | 0.34 |
| succinic acid     | 0.1  | 0.03 | 0.1  | 0.08 | 0.08 | 1.6  | 2    | 0.1  | 0.8  | 0.4  |
| L-tyrosine        | 0.8  | 0.03 | 1.2  | 0.16 | 0.4  | 0.12 | 1.6  | 0.44 | 0.16 | 2    |

**Table S-2:** Experimental design for the 15 standard mixtures (S1-S10). Units for all metabolite concentrations are mM.

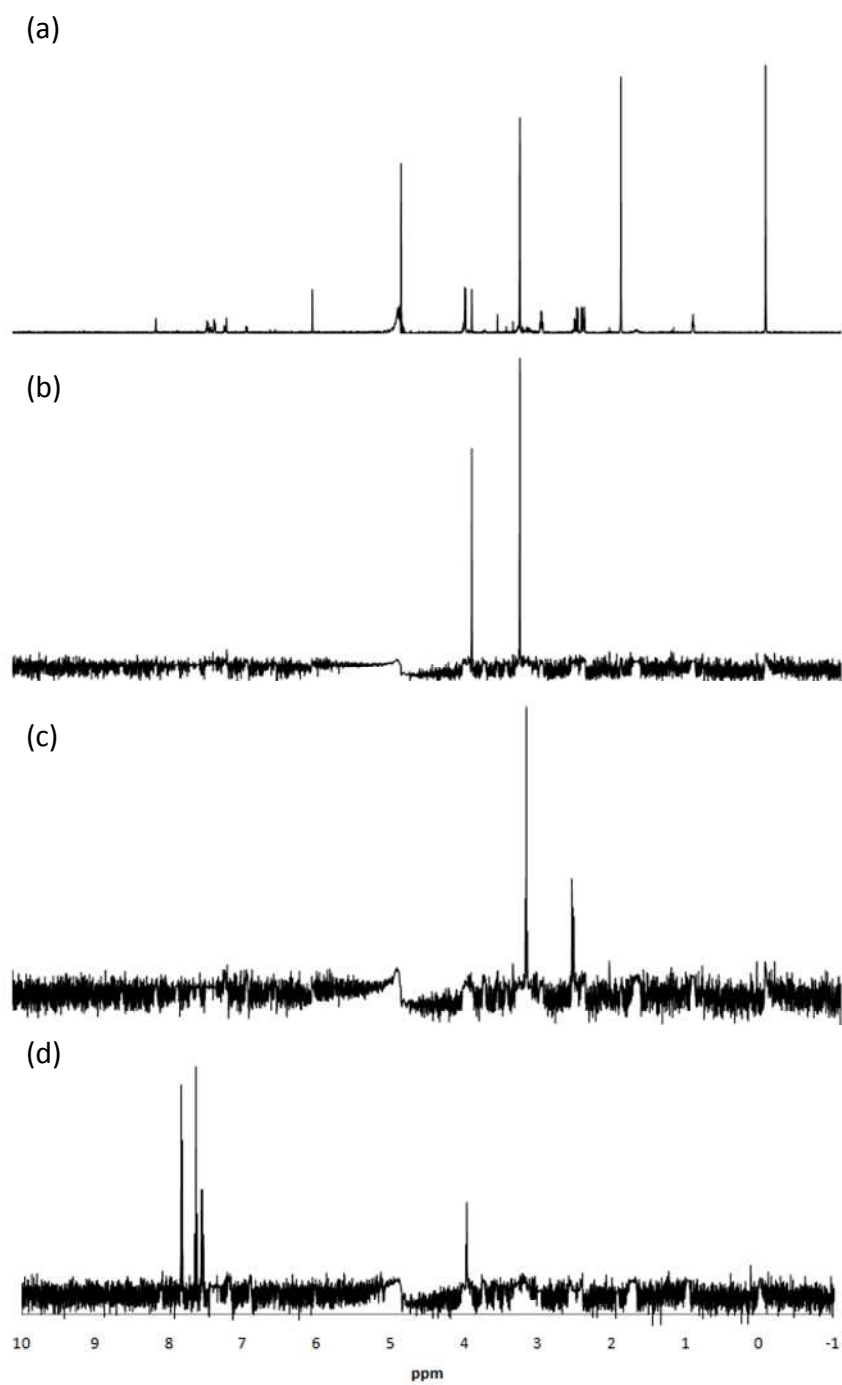

**Figure S-1:** (a)  $^1\text{H}$  NMR spectrum of a mixture of 15 standard compounds; (b)-(d) Selective detection of (b) betaine, (c)  $\beta$ -alanine and (d) hippuric acid by the RANSY method; (b), (c) and (d) were generated from 10  $^1\text{H}$  NMR spectra of mixtures, and the driving peaks are the same as in Figure 1.

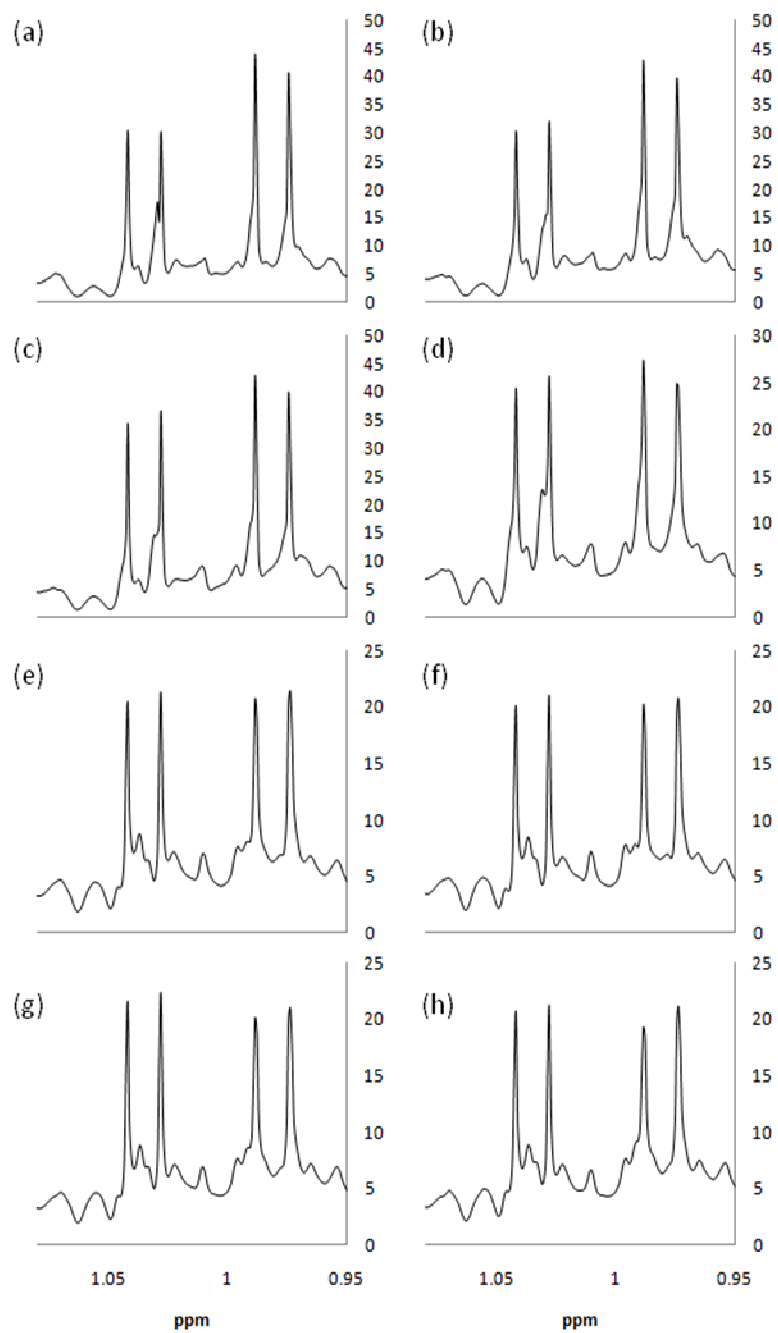

**Figure S-2:** RANSY spectra of valine calculated for different sample numbers ( $n$ ): (a)  $n=5$ ; (b)  $n=7$ ; (c)  $n=10$ ; (d)  $n=15$ ; (e)  $n=20$ ; (f)  $n=30$ ; (g)  $n=40$ ; and (h)  $n=80$ .

| <b>Name</b>               | <b>Peak No.</b> |
|---------------------------|-----------------|
| acetic acid               | 29              |
| <i>cis</i> -aconitic acid | 20,21,22        |
| beta-alanine              | 31              |
| betaine                   | 24              |
| citric acid               | 5,6,7           |
| L-cysteine                | 43              |
| formic acid               | 27              |
| fumaric acid              | 25              |
| glucuronic acid           | 3,4             |
| L-glutamic acid*          | 8               |
| glycine                   | 40              |
| guanidineacetic acid      | 44              |
| hippuric acid             | 41              |
| L-histidine               | 45              |
| 4-hydroxyl-L-proline*     | 9               |
| isocitric acid            | 11,12,13,14     |
| L-lactic acid             | 1,2,47          |
| L-leucine                 | 15              |
| maleic acid               | 26              |
| malic acid                | 17,18           |
| malonic acid              | 28              |
| L-mandelic acid           | 23              |
| L-methionine              | 39              |
| methylmalonic acid        | 32              |
| octanoic acid             | 30              |
| oxalic acid*              | 19              |
| L-phenylalanine           | 37              |
| propionic acid            | 34              |
| suberic acid              | 42              |
| succinic acid             | 33              |
| L-threonine               | 35              |
| L-tryptophan              | 38              |
| L-tyrosine                | 36              |

**Table S-3:** 33 metabolites assigned by RANSY in the mixtures and their peak numbers in Figure 4(a). The metabolites with asterisks have one peak missing.

## Supplementary Codes:

```
setwd("C:\\research\\RANSY_paper\\1d")
```

```
#####peak driving RANSY
```

```
data=read.csv("ransy1d.csv",head=F)
```

```
drive=read.csv("citric.csv",head=F)
```

```
ppm=data[,1]
```

```
data=data[,-1]
```

```
a=nrow(data)+1
```

```
data=as.matrix(data)
```

```
drive=as.matrix(drive)
```

```
b=nrow(data)
```

```
data=rbind(data,drive)
```

```
ratio=array(0,dim=c(1,b))
```

```
####mean/sd####
```

```
ratio=array(0,dim=c(1,b))
```

```
for (i in 1:b)
```

```
{ratio[1,i]=mean(data[i,]/data[a,])/sd(data[i,]/data[a,])}
```

```
ratio_r=cbind(ppm,t(ratio))
```

```
write.csv(ratio_r,"citric_ratio.csv",col.names=F,row.names=F)
```

```
#####2d#####
```

```
data=read.csv("C:\\research\\RANSY_paper\\2d\\ransy2d1.csv",head=FALSE)
```

```
data=as.matrix(data)
```

```
a=nrow(data)
```

```
b=ncol(data)
ratio=array(0,dim=c(a,a))
for ( i in 1:a) {for (j in 1:a) {
ratio[i,j]=mean(data[i,]/data[j,])/sd(data[i,]/data[j,])} }
write.csv(ratio,"C:\\research\\RANSY_paper\\2d\\ransyresult1.csv")
```
